# Supplementary material for: Postzygotic single-nucleotide mosaicisms in whole-genome sequences of clinically unremarkable individuals
Source: PubMed Central journal article supplement — Cell Res. 2014 Oct 14;24(11):1311–27. doi: 10.1038/cr.2014.131 (PMC4220156; doi:10.1038/cr.2014.131), 2014-10-14

**Figure S2.** The minor allele fractions in ACC1-II-1 postzygotic single-nucleotide mutations among biological samples and technical replicates. Three independent DNA extractions of peripheral-blood samples from ACC1-II-1 were performed and each piece of DNA was pyrosequenced three times. This suggested that the observed inter-sample variation of allele fractions could not be explained by the reproducibility of DNA extraction and pyrosequencing.

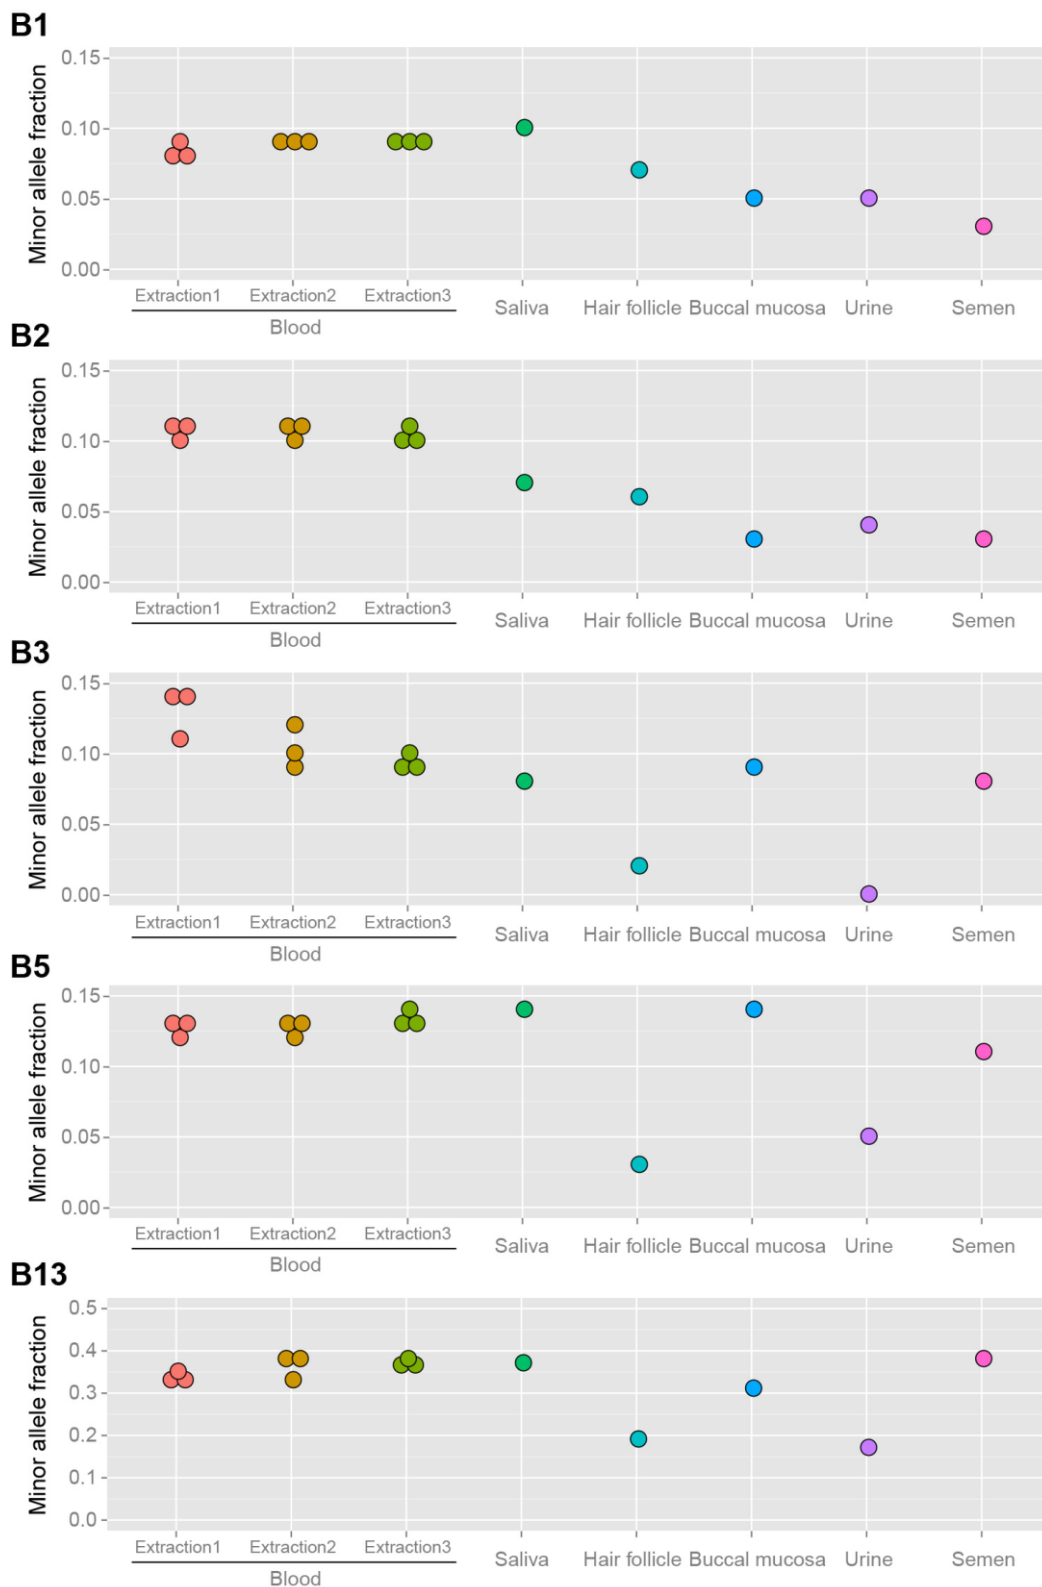

Supplement: cr2014131x2.pdf [file cr2014131x2.pdf]
