# Supplementary material for: Postzygotic single-nucleotide mosaicisms in whole-genome sequences of clinically unremarkable individuals
Source: PubMed Central journal article supplement — Cell Res. 2014 Oct 14;24(11):1311–27. doi: 10.1038/cr.2014.131 (PMC4220156; doi:10.1038/cr.2014.131), 2014-10-14

**Figure S3.** The sensitivity of detecting postzygotic single-nucleotide mutations (pSNMs) with varied alternative allele fractions. The plot illustrates the proportion of simulated pSNMs remaining after our genotyper and error filters. As expected, the sensitivity strongly depended on the expected minor allele fraction.

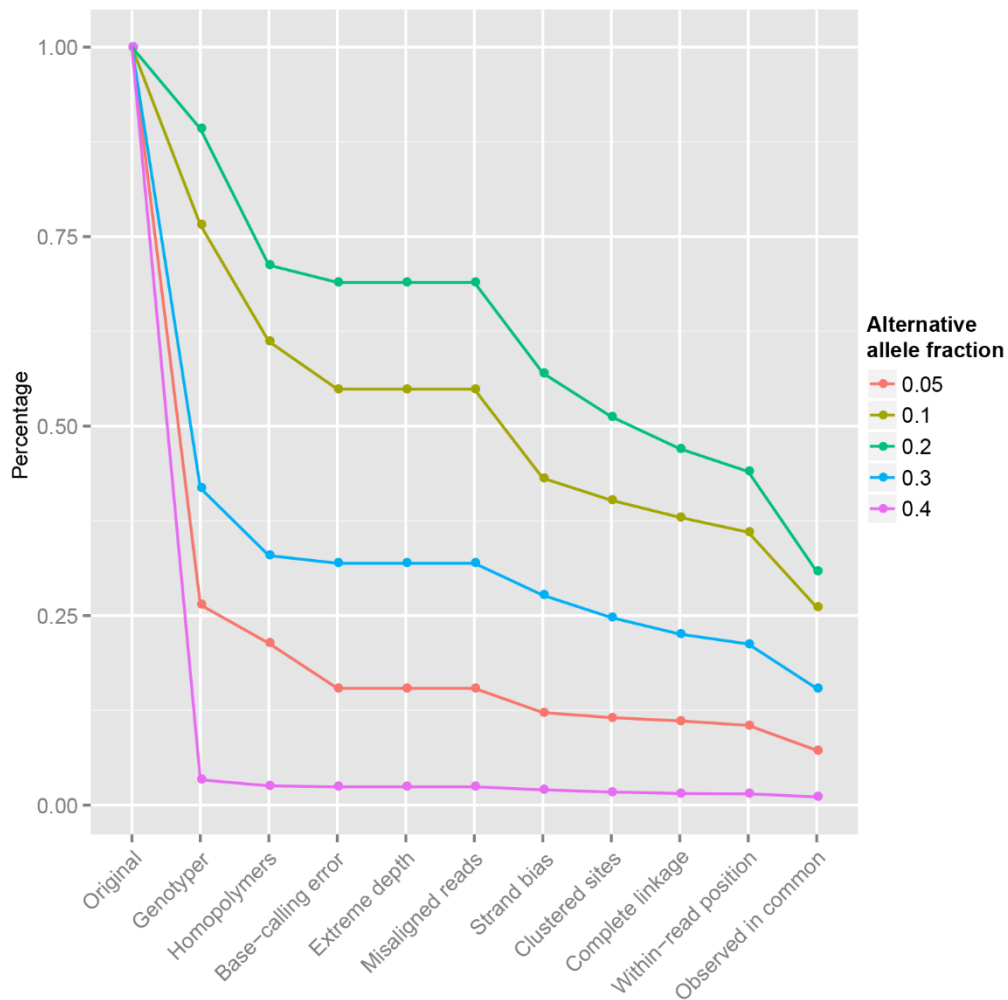

Supplement: cr2014131x3.pdf [file cr2014131x3.pdf]
