# Supplementary material for: Postzygotic single-nucleotide mosaicisms in whole-genome sequences of clinically unremarkable individuals
Source: PubMed Central journal article supplement — Cell Res. 2014 Oct 14;24(11):1311–27. doi: 10.1038/cr.2014.131 (PMC4220156; doi:10.1038/cr.2014.131), 2014-10-14

**Figure S4.** The theoretical sensitivity to identify postzygotic single-nucleotide mutations (pSNMs) with varied minor allele fraction, sequencing depth, and base quality. The base quality was set as 30 (A) and 60 (B). The sensitivity to detect pSNMs increased when either the sequencing depth or the base quality increased.

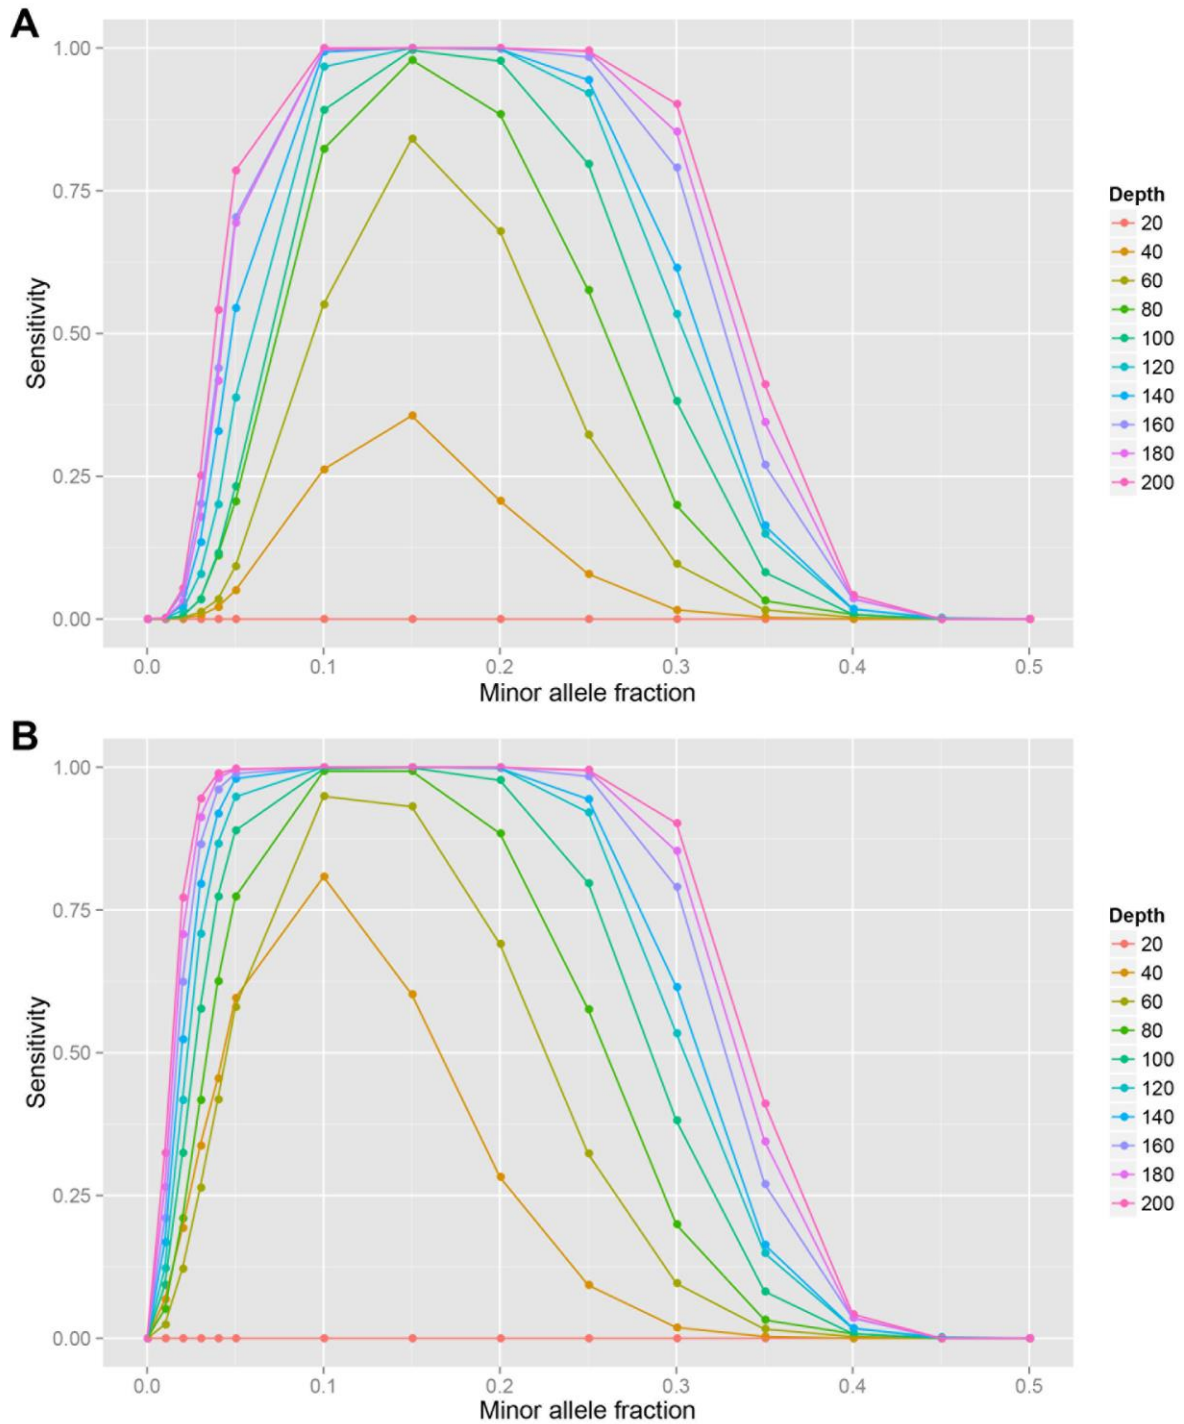

Supplement: cr2014131x4.pdf [file cr2014131x4.pdf]
