# Supplementary material for: Postzygotic single-nucleotide mosaicisms in whole-genome sequences of clinically unremarkable individuals
Source: PubMed Central journal article supplement — Cell Res. 2014 Oct 14;24(11):1311–27. doi: 10.1038/cr.2014.131 (PMC4220156; doi:10.1038/cr.2014.131), 2014-10-14

**Figure S5.** Examples of clustered sites with abnormal alternative allele fractions. The plots show the alternative allele fractions and the genomic positions along the chromosomes. The clustered sites were marked in gray and highlighted by red arrows. These sites were clustered in heterochromatin regions such as the centromeres and telomeres or copy number variations.

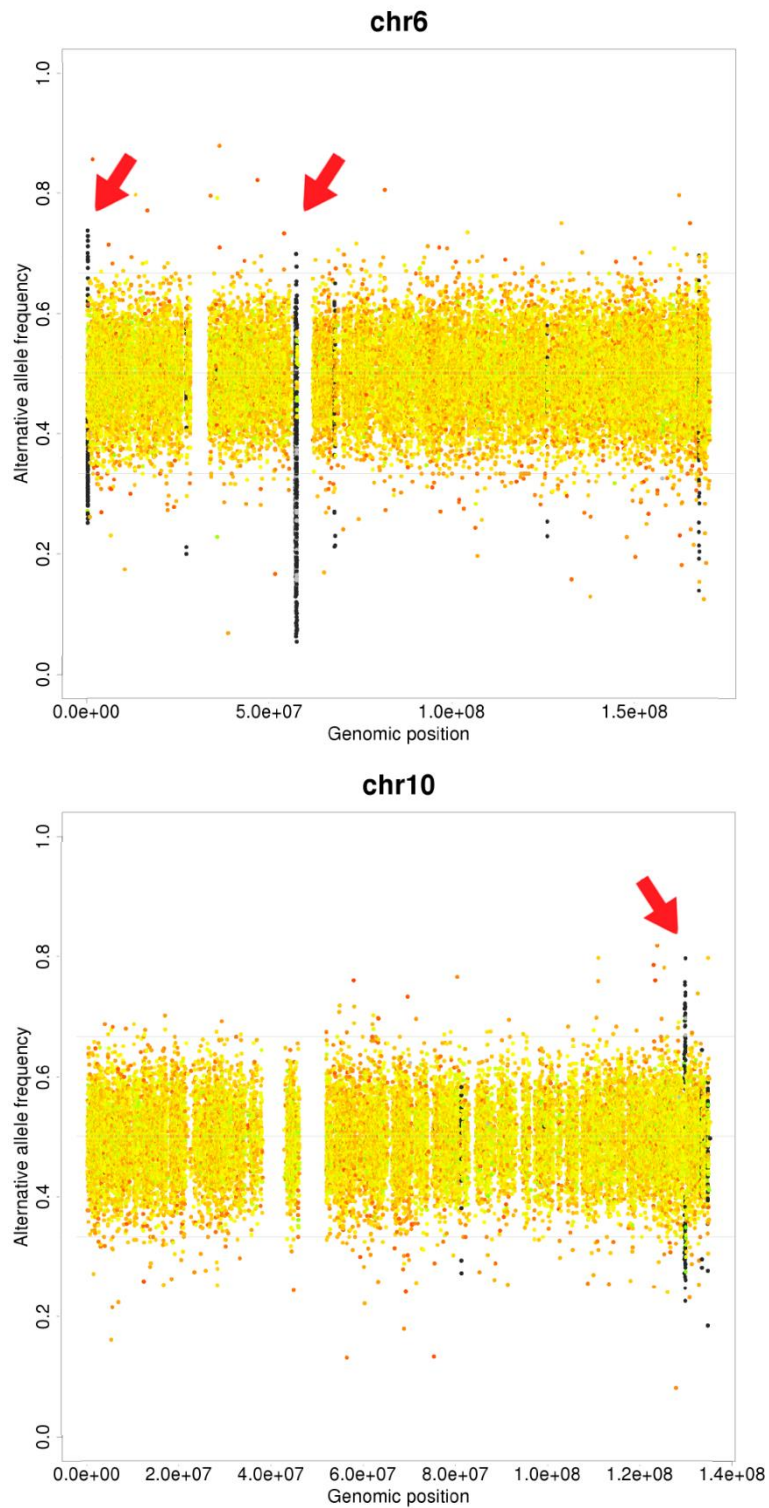

Supplement: cr2014131x5.pdf [file cr2014131x5.pdf]
