# Supplementary material for: Postzygotic single-nucleotide mosaicisms in whole-genome sequences of clinically unremarkable individuals
Source: PubMed Central journal article supplement — Cell Res. 2014 Oct 14;24(11):1311–27. doi: 10.1038/cr.2014.131 (PMC4220156; doi:10.1038/cr.2014.131), 2014-10-14

**Figure S6.** Distributions of the minor allele fractions of the simulated sites with varied expected allele fractions. The expected distributions were generated assuming that the allele fraction followed a binomial sampling process with  $P = 0, 0.05, 0.1, 0.2, 0.3, 0.4,$  and  $0.5$ . The plots demonstrated that our simulation strategy can mimic the real sequencing data at polymorphic sites.

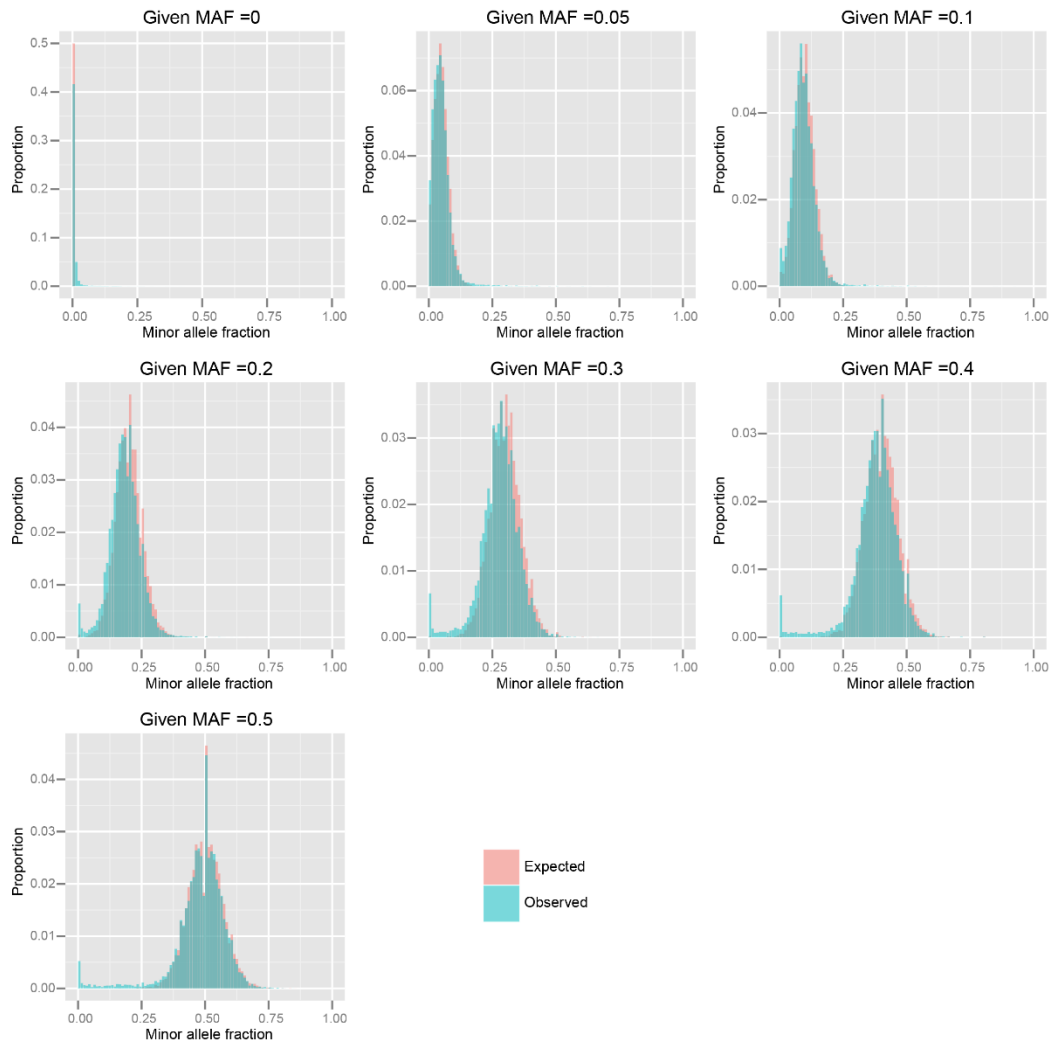

Supplement: cr2014131x6.pdf [file cr2014131x6.pdf]
