# Supplementary material for: Postzygotic single-nucleotide mosaicisms in whole-genome sequences of clinically unremarkable individuals
Source: PubMed Central journal article supplement — Cell Res. 2014 Oct 14;24(11):1311–27. doi: 10.1038/cr.2014.131 (PMC4220156; doi:10.1038/cr.2014.131), 2014-10-14
Supplement: cr2014131x8.pdf [file cr2014131x8.pdf]

**Table S1.** Overview of the whole-genome sequencing data

| <b>ID</b>        | <b>Tissue type</b> | <b>Protocol</b> | <b># Raw reads</b> | <b># Mappable reads</b> | <b># Clean reads*</b> | <b>Depth</b> |
|------------------|--------------------|-----------------|--------------------|-------------------------|-----------------------|--------------|
| <b>ACC1-II-1</b> | Blood              | 100bp, PE       | 3,310,551,412      | 3,153,459,526           | 2,707,907,255         | 90X          |
| <b>DS1-II-2</b>  | Blood              | 100bp, PE       | 3,225,109,320      | 3,097,723,302           | 2,393,004,900         | 80X          |
| <b>DS2-I-1</b>   | Blood              | 100bp, PE       | 2,990,509,808      | 2,871,412,207           | 2,276,650,271         | 76X          |

\*: The number of reads after removing improperly-paired, duplicated, multiple-hit and too-many-error reads
