# Supplementary material for: Postzygotic single-nucleotide mosaicisms in whole-genome sequences of clinically unremarkable individuals
Source: PubMed Central journal article supplement — Cell Res. 2014 Oct 14;24(11):1311–27. doi: 10.1038/cr.2014.131 (PMC4220156; doi:10.1038/cr.2014.131), 2014-10-14
Supplement: cr2014131x9.pdf [file cr2014131x9.pdf]

**Table S2.** The complete list of candidate postzygotic single-nucleotide mutations identified by our computational pipeline

| <b>Individual</b> | <b>ID</b> | <b>Position</b> | <b>Ref base</b> | <b>Alt base</b> | <b>P(mosaic)</b> | <b>Validated?</b> |
|-------------------|-----------|-----------------|-----------------|-----------------|------------------|-------------------|
| ACC1-II-1         | B1        | 15:80878576     | C               | T               | 1.00             | True              |
| ACC1-II-1         | B2        | 4:165099831     | C               | T               | 1.00             | True              |
| ACC1-II-1         | B3        | 6:85605629      | A               | T               | 1.00             | True              |
| ACC1-II-1         | B4        | 10:115352263    | C               | T               | 0.96             | False             |
| ACC1-II-1         | B5        | 6:154692299     | G               | C               | 0.95             | True              |
| ACC1-II-1         | B6        | 18:31333885     | A               | G               | 0.41             | False             |
| ACC1-II-1         | B7        | 15:45732364     | G               | A               | 0.21             | False             |
| ACC1-II-1         | B8        | 6:76955874      | G               | T               | 0.17             | False             |
| ACC1-II-1         | B9        | 3:158917393     | C               | T               | 0.16             | False             |
| ACC1-II-1         | B10       | 8:11688362      | A               | G               | 0.11             | False             |
| ACC1-II-1         | B11       | 19:4032107      | G               | A               | 0.08             | False             |
| ACC1-II-1         | B12       | 7:19343958      | C               | T               | 0.08             | False             |
| ACC1-II-1         | B13       | 18:70512197     | T               | G               | 0.07             | True              |
| ACC1-II-1         | B14       | 7:147539364     | G               | A               | 0.06             | False             |
| ACC1-II-1         | B15       | 6:123036854     | A               | T               | 0.05             | False             |
| DS1-II-2          | F1        | 17:52287119     | G               | T               | 1.00             | True              |
| DS1-II-2          | F2        | 19:55529705     | C               | T               | 1.00             | True              |
| DS1-II-2          | F3        | 19:56343191     | T               | C               | 1.00             | True              |
| DS1-II-2          | F4        | 20:4339054      | G               | A               | 1.00             | False             |
| DS1-II-2          | F5        | 4:190179317     | C               | T               | 1.00             | False             |
| DS1-II-2          | F6        | 14:71380614     | T               | G               | 0.98             | True              |
| DS1-II-2          | F7        | 16:84073033     | A               | C               | 0.95             | True              |
| DS1-II-2          | F8        | 7:132334892     | C               | T               | 0.13             | False             |
| DS1-II-2          | F9        | 13:79932615     | C               | A               | 0.12             | True              |
| DS1-II-2          | F10       | 2:166848782     | G               | C               | 0.09             | True              |
| DS2-I-1           | X1        | 1:72008400      | A               | G               | 1.00             | True              |
| DS2-I-1           | X2        | 16:64312186     | C               | T               | 1.00             | True              |
| DS2-I-1           | X3        | X:68611473      | C               | A               | 1.00             | True              |

|         |     |             |   |   |      |       |
|---------|-----|-------------|---|---|------|-------|
| DS2-I-1 | X4  | 20:60500224 | C | T | 1.00 | False |
| DS2-I-1 | X5  | 22:18619901 | G | A | 0.98 | False |
| DS2-I-1 | X6  | 2:166854673 | G | T | 0.95 | True  |
| DS2-I-1 | X7  | 6:35755658  | A | G | 0.89 | False |
| DS2-I-1 | X8  | 13:89662020 | A | C | 0.69 | True  |
| DS2-I-1 | X9  | 2:79895035  | A | G | 0.44 | False |
| DS2-I-1 | X10 | 4:3472325   | T | C | 0.12 | False |
| DS2-I-1 | X11 | 16:48880245 | T | C | 0.09 | False |
| DS2-I-1 | X12 | 18:11785347 | G | A | 0.06 | False |
| DS2-I-1 | X13 | 17:59415198 | G | T | 0.06 | False |

---
