# Supplementary material for: Postzygotic single-nucleotide mosaicisms in whole-genome sequences of clinically unremarkable individuals
Source: PubMed Central journal article supplement — Cell Res. 2014 Oct 14;24(11):1311–27. doi: 10.1038/cr.2014.131 (PMC4220156; doi:10.1038/cr.2014.131), 2014-10-14

**Table S3.** Sanger sequencing results of TA-clones and direct sequencing for the validated postzygotic single-nucleotide mutations

| Individual | Position    | Ref base | Alt base | Ref TA-clone                                  | Alt TA-clone                                  | Direct sequencing                             |
|------------|-------------|----------|----------|-----------------------------------------------|-----------------------------------------------|-----------------------------------------------|
| ACC1-II-1  | 15:80878576 | C        | T        | <p>G C A T A C A C A T A</p> <p>(Forward)</p> | <p>G C A T A T A C A T A</p> <p>(Forward)</p> | <p>G C A T A C A C A T A</p> <p>(Forward)</p> |
| ACC1-II-1  | 4:165099831 | C        | T        | <p>C T A T G C C A T A T</p> <p>(Forward)</p> | <p>C T A T G T C A T A T</p> <p>(Forward)</p> | <p>C T A T G C C A T A T</p> <p>(Forward)</p> |
| ACC1-II-1  | 6:85605629  | A        | T        | <p>G T G A T A G G A A A</p> <p>(Forward)</p> | <p>G T G A T T G G A A A</p> <p>(Forward)</p> | <p>G T G A T A G G A A A</p> <p>(Forward)</p> |

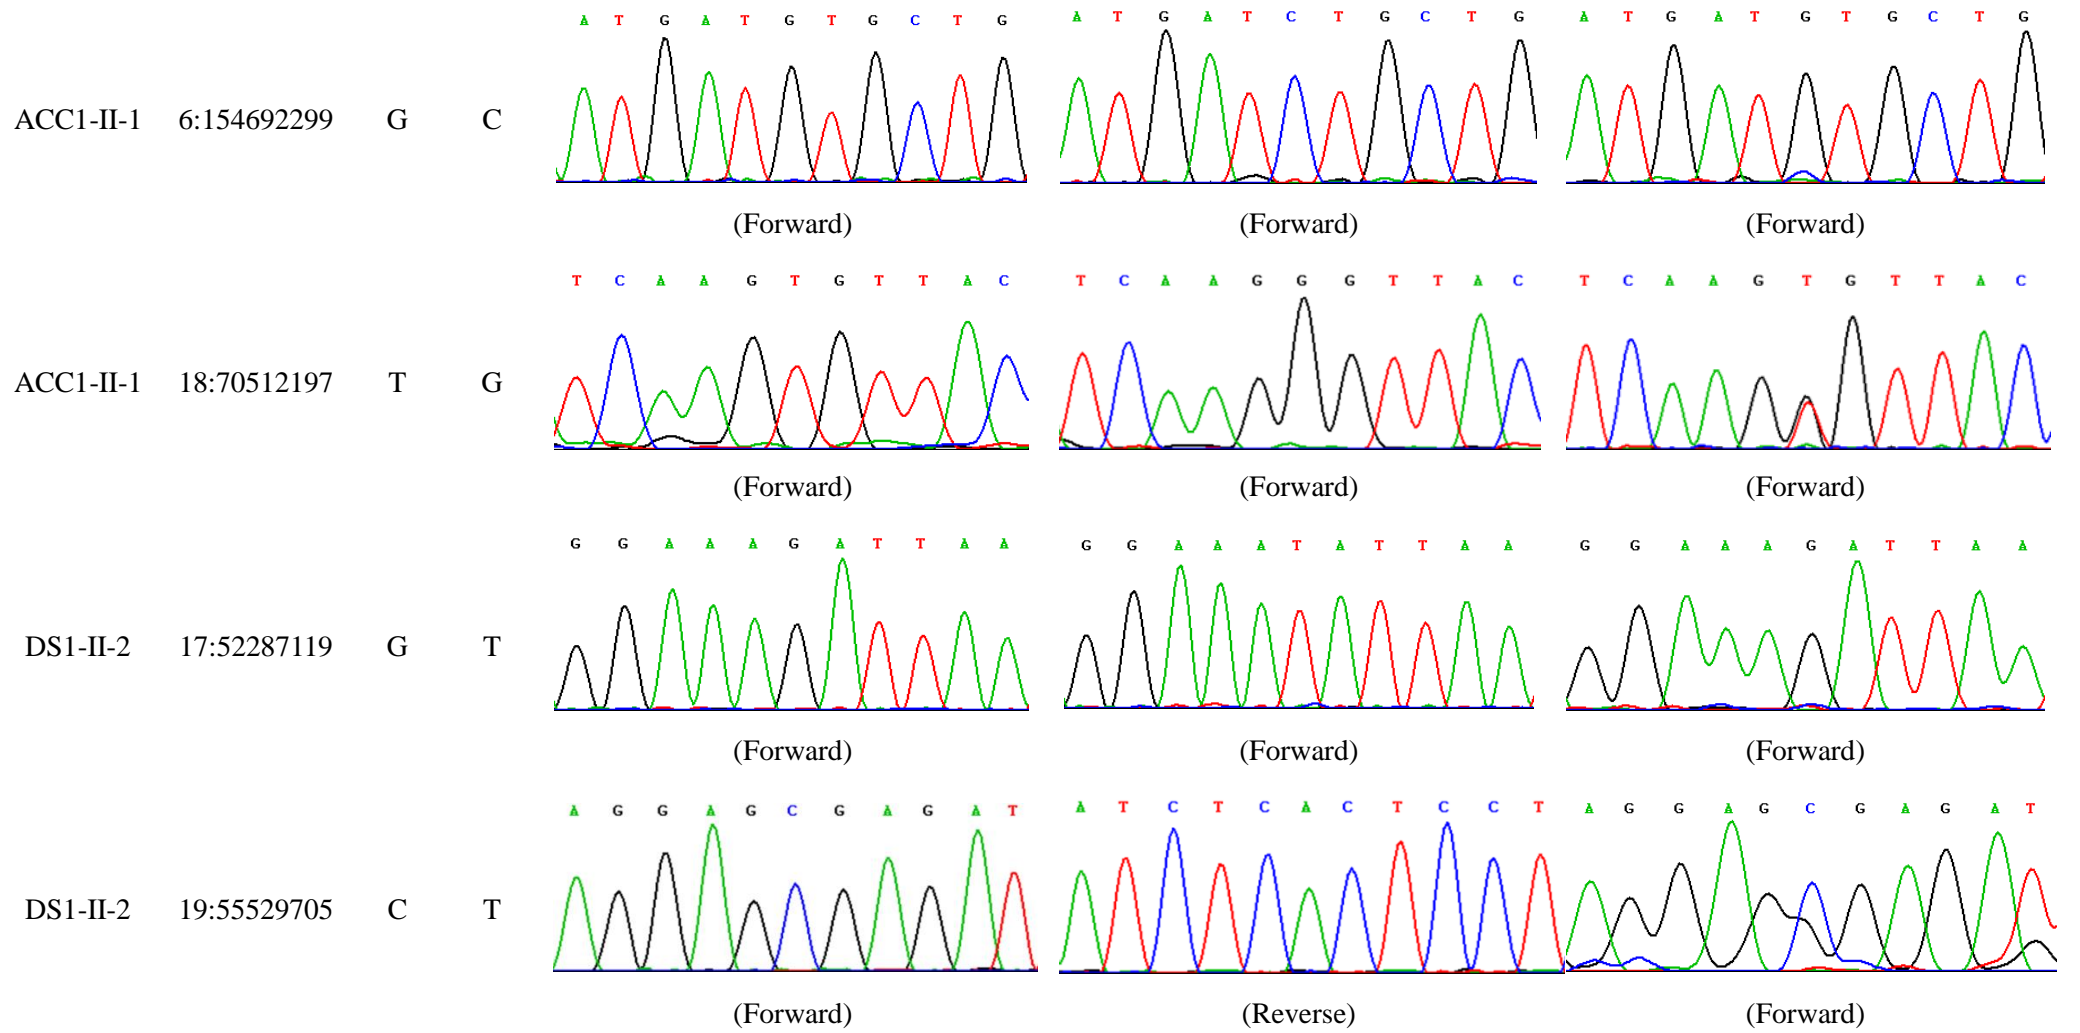

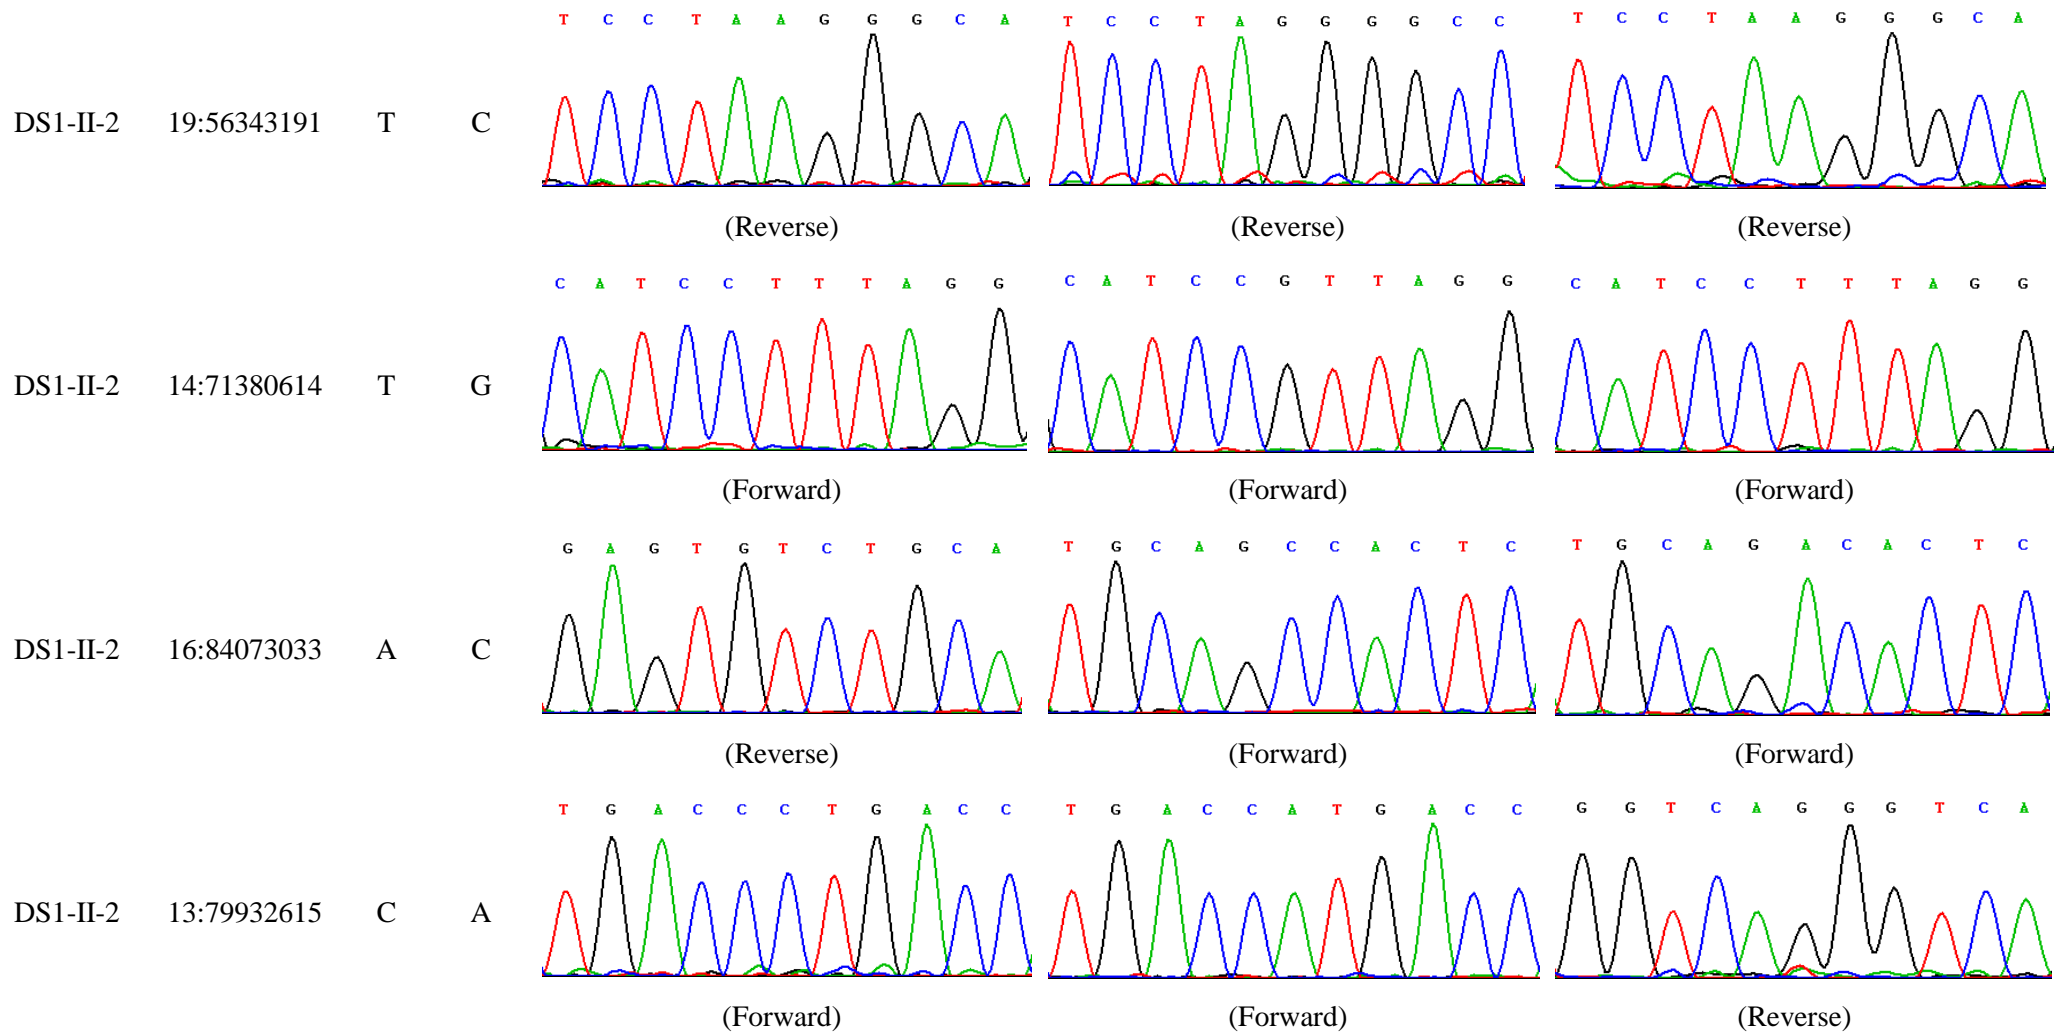

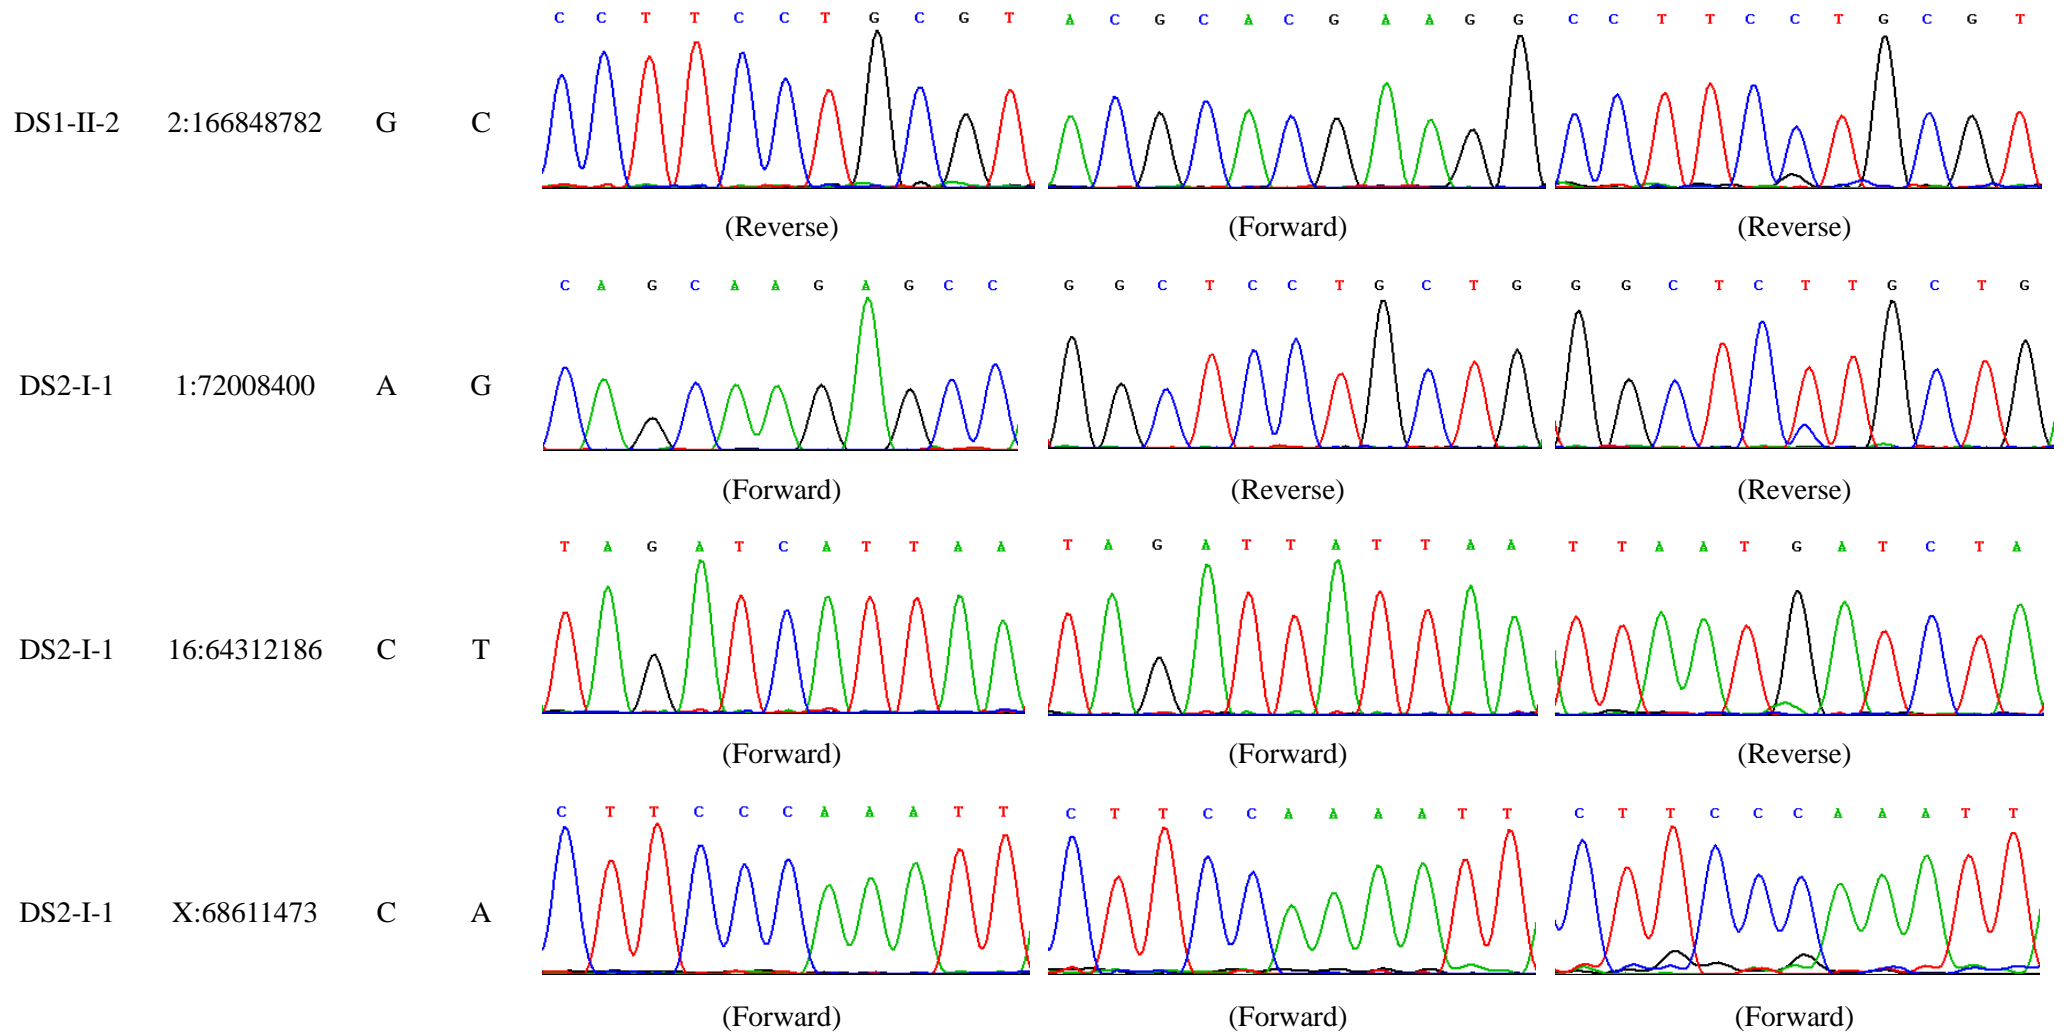

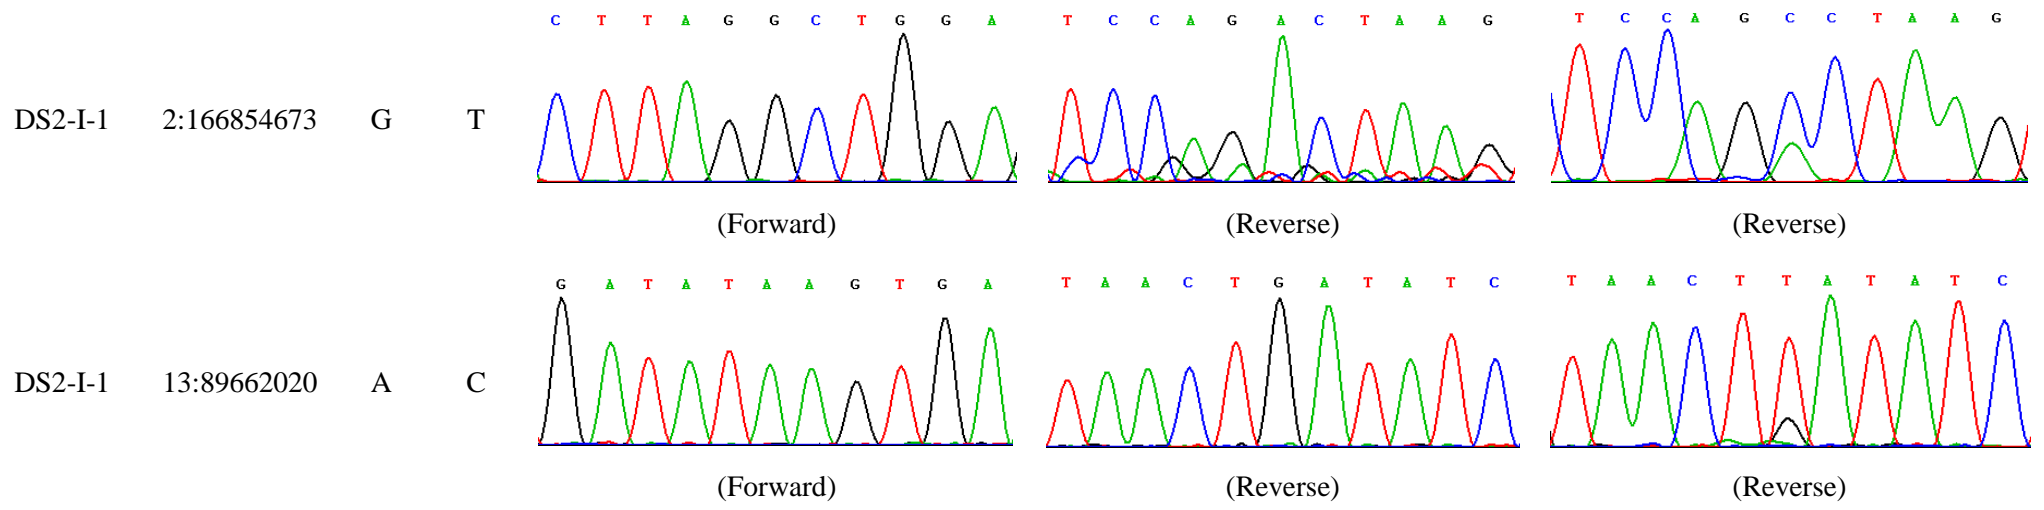

Supplement: cr2014131x10.pdf [file cr2014131x10.pdf]
