# Supplementary material for: Postzygotic single-nucleotide mosaicisms in whole-genome sequences of clinically unremarkable individuals
Source: PubMed Central journal article supplement — Cell Res. 2014 Oct 14;24(11):1311–27. doi: 10.1038/cr.2014.131 (PMC4220156; doi:10.1038/cr.2014.131), 2014-10-14
Supplement: cr2014131x11.pdf [file cr2014131x11.pdf]

**Table S4.** Results of pyrosequencing and Sanger sequencing for the two *SCN1A* variants

| Position    | Individual | Identity | Genotype | Alt % in pyrosequencing | Sanger sequencing                             |
|-------------|------------|----------|----------|-------------------------|-----------------------------------------------|
| 2:166848782 | DS1-II-2   | Mother   | Mosaic   | 27%                     | <p>C C T T C C T G C G T</p> <p>(Reverse)</p> |
|             | DS1-II-1   | Father   | Ref-hom  | 5%                      | <p>C C T T C C T G C G T</p> <p>(Reverse)</p> |
|             | DS1-III-1  | Son      | Hetero   | 59%                     | <p>C C T T C C T G C G T</p> <p>(Reverse)</p> |
| 2:166854673 | DS2-I-1    | Mother   | Ref-hom  | 3%                      | <p>C T T A G G C T G G A</p> <p>(Forward)</p> |
|             | DS2-I-1    | Father   | Mosaic   | 22%                     | <p>T C C A G C C T A A G</p> <p>(Reverse)</p> |
|             | DS2-I-1    | Son      | Hetero   | 49%                     | <p>C T T A G G C T G G A</p> <p>(Forward)</p> |
