# Supplementary material for: Postzygotic single-nucleotide mosaicisms in whole-genome sequences of clinically unremarkable individuals
Source: PubMed Central journal article supplement — Cell Res. 2014 Oct 14;24(11):1311–27. doi: 10.1038/cr.2014.131 (PMC4220156; doi:10.1038/cr.2014.131), 2014-10-14
Supplement: cr2014131x12.pdf [file cr2014131x12.pdf]

**Table S5.** The data source for generating simulated sequencing data

---

|                | <b>URL</b>                                                                                                                                                                                                                                                                                                                                                                                                                                                                                 |
|----------------|--------------------------------------------------------------------------------------------------------------------------------------------------------------------------------------------------------------------------------------------------------------------------------------------------------------------------------------------------------------------------------------------------------------------------------------------------------------------------------------------|
| <b>NA12878</b> | <a href="http://ftp.1000genomes.ebi.ac.uk/vol1/ftp/technical/working/20120117_ceu_trio_b37_decoy/CEUTrio.HiSeq.WGS.b37_decoy.NA12878.clean.dedup.recal.20120117.bam">http://ftp.1000genomes.ebi.ac.uk/vol1/ftp/technical/working/20120117_ceu_trio_b37_decoy/CEUTrio.HiSeq.WGS.b37_decoy.NA12878.clean.dedup.recal.20120117.bam</a><br><a href="ftp://ftp.platinumgenomes.org/1463_family/NA12878_S1.genome.vcf.gz">ftp://ftp.platinumgenomes.org/1463_family/NA12878_S1.genome.vcf.gz</a> |
| <b>NA12891</b> | <a href="http://ftp.1000genomes.ebi.ac.uk/vol1/ftp/technical/working/20120117_ceu_trio_b37_decoy/CEUTrio.HiSeq.WGS.b37_decoy.NA12891.clean.dedup.recal.20120117.bam">http://ftp.1000genomes.ebi.ac.uk/vol1/ftp/technical/working/20120117_ceu_trio_b37_decoy/CEUTrio.HiSeq.WGS.b37_decoy.NA12891.clean.dedup.recal.20120117.bam</a><br><a href="ftp://ftp.platinumgenomes.org/1463_family/NA12891_S1.genome.vcf.gz">ftp://ftp.platinumgenomes.org/1463_family/NA12891_S1.genome.vcf.gz</a> |

---
