# Supplementary material for: Postzygotic single-nucleotide mosaicisms in whole-genome sequences of clinically unremarkable individuals
Source: PubMed Central journal article supplement — Cell Res. 2014 Oct 14;24(11):1311–27. doi: 10.1038/cr.2014.131 (PMC4220156; doi:10.1038/cr.2014.131), 2014-10-14
Supplement: cr2014131x14.pdf [file cr2014131x14.pdf]

**Table S7.** The primers of Sanger sequencing for validation

| <b>Individual</b> | <b>Position</b> | <b>Forward primer</b>    | <b>Reverse primer</b>  | <b>T<sub>m</sub> (°C)</b> |
|-------------------|-----------------|--------------------------|------------------------|---------------------------|
| ACC1-II-1         | 15:80878576     | ACATCCTGCACACTGCGTTA     | ATGGACATGCTGTTGCTTGC   | 60                        |
| ACC1-II-1         | 4:165099831     | AGGCCTGACTGAGGGATACA     | TGGGGTGGTTCTAGGGGAAG   | 60                        |
| ACC1-II-1         | 6:85605629      | TGCTTGGCACTGTCCTGAAA     | GCCCAGAAGTGCCTACGTTA   | 60.5                      |
| ACC1-II-1         | 10:115352263    | AACTCATCAGTGACCGCAGG     | GCCTCTATCGGTGATGTGGG   | 60                        |
| ACC1-II-1         | 6:154692299     | TTCTGTTCCAGCCTCCGATG     | TAAGTCGGCATCCCTGTGGA   | 60.5                      |
| ACC1-II-1         | 18:31333885     | TCTGGGATGTTACAGCGTCG     | AGGTGAGGACGTTCAGTGAG   | 59                        |
| ACC1-II-1         | 15:45732364     | TGTTTGACTATATCAGTTGCCTGT | ATGCCCACTCTCCAAATAAGCA | 69                        |
| ACC1-II-1         | 6:76955874      | GGGAACCGGTCATAGAGACA     | GTGATGGTGGCTGACTTCTCA  | 59                        |
| ACC1-II-1         | 3:158917393     | TCTTCTGGGTATCTGCCTCCA    | CTCCTGTGGGTCTTGGTGTC   | 60                        |
| ACC1-II-1         | 8:11688362      | GTGGATACGGGGCTAAAGGG     | CAATGCCAGGGGGAGAACAA   | 60                        |
| ACC1-II-1         | 19:4032107      | CCGGGCTTAACTCCTCAGTG     | GTAGCTCAGGAGAGACCCCA   | 60                        |
| ACC1-II-1         | 7:19343958      | CAGGAACCCAGACAGAGTGG     | GAAAGCACCGACACTTTGTAGT | 59.5                      |
| ACC1-II-1         | 18:70512197     | CGTATCTGGCGTCTCACTCA     | CATGTGCGTAATGTGGGGTG   | 59                        |
| ACC1-II-1         | 7:147539364     | TGGTCAAAGTTGCCATTAATTGTT | CCCCTTGTTCTCAGAGCTGC   | 59                        |
| ACC1-II-1         | 6:123036854     | ATGTACCATGGGAGGGCTCA     | AGCACTCAGGCATGCAAATC   | 60                        |
| DS1-II-2          | 17:52287119     | GCTCCAGGAAGCAAAGACCAT    | CCAAGGCTTCAGGCTATGAAA  | 62                        |
| DS1-II-2          | 19:55529705     | GGCCTGGAGCGGTTAGAAG      | GCTAGAGCATGGGTGCAGAGT  | 62                        |

|          |             |                              |                                    |    |
|----------|-------------|------------------------------|------------------------------------|----|
| DS1-II-2 | 19:56343191 | GCGTGTGCCTGTCATTCCT          | TTCTTCCCGCTGCCTAGCT                | 58 |
| DS1-II-2 | 20:4339054  | GGGAGACGCTGATGGAAAGA         | ACATTGACTGGTGCCTACCTTATG           | 62 |
| DS1-II-2 | 4:190179317 | TCTTTTTGAGAAGGGCAAATTTTATG   | TCTGGAAGTAAAAGGAACAATGCTATAA       | 58 |
| DS1-II-2 | 14:71380614 | GGGTGACTAAAACAGGGATTTTCATAT  | TGTGCCATGACCAGTTATGGA              | 62 |
| DS1-II-2 | 16:84073033 | GGAAACAGACACATGCAATTGTAAA    | CACCCTGCTAGTTTTTTGTGATTTT          | 62 |
| DS1-II-2 | 7:132334892 | GGTCCCATAGCTCATGCAGATAG      | GCACTATTCTATGGGCTGGGATT            | 58 |
| DS1-II-2 | 13:79932615 | TTCCCTAAACAGAAAGAAGAGATAACAA | AAGTAGAGGTGGATCAGAAGTGGAA          | 58 |
| DS1-II-2 | 2:166848782 | TGTTGAGAATGGGTGCTAGCAAT      | TCCGAGTGATCCGTCTTGCT               | 62 |
| DS2-I-1  | 1:72008400  | TGGCCTTTTCACTCCCAATC         | CCAGAATTGGTTGGATCAGGAA             | 62 |
| DS2-I-1  | 16:64312186 | GGAATGGTGAGAGGGTTGGA         | CACAAGGTTACATAGCATAGTCATG          | 55 |
| DS2-I-1  | X:68611473  | CCAGAAGGCCCAGGTGAGA          | GTCAGCCTGTCCATCAACCA               | 64 |
| DS2-I-1  | 20:60500224 | CACTGGAATCAGGTCCACAGTTT      | ACTTGGCAGAGGAGGAAACTGA             | 55 |
| DS2-I-1  | 22:18619901 | AGGGAGAGGGTTTGGAGATCA        | CATTACTTCCAACAGGTCAGCATT           | 58 |
| DS2-I-1  | 2:166854673 | CTTTTTCTGCTGGTTGAAATTATCTATG | AAAGGCCAATTTTCAGGGATGT             | 62 |
| DS2-I-1  | 6:35755658  | GACATAGAGGTCCTGCGATGGT       | CTCTTTATTTCAATCACTCCCCACTT         | 58 |
| DS2-I-1  | 13:89662020 | CCGTTGACTTTTATTTCTCAAAATTCC  | CATCATGCTGGACACAATACATATATACA      | 62 |
| DS2-I-1  | 2:79895035  | TGCTCTTTAGCATGTATTTGGAGTTC   | TTTACTAGTATGAATTTTCAGTTGGTATAGGACT | 58 |
| DS2-I-1  | 4:3472325   | GCTGCTGCGTTCAGACAATC         | CCGACGTCACCCTTTTGG                 | 55 |
| DS2-I-1  | 16:48880245 | CCATGGTGAGCCCAGGATT          | GGCAAGTCAGAAGCTTCAGTGAT            | 58 |

|         |             |                       |                        |    |
|---------|-------------|-----------------------|------------------------|----|
| DS2-I-1 | 18:11785347 | CCCAGTCCCACGCTCAGTT   | AAACTCTGAAAGGCTGGATGGA | 58 |
| DS2-I-1 | 17:59415198 | CAGGTCTTCCTCTTGGAGCAA | GCCCCGCCAGAGACT        | 58 |

---
