# Supplementary material for: Postzygotic single-nucleotide mosaicisms in whole-genome sequences of clinically unremarkable individuals
Source: PubMed Central journal article supplement — Cell Res. 2014 Oct 14;24(11):1311–27. doi: 10.1038/cr.2014.131 (PMC4220156; doi:10.1038/cr.2014.131), 2014-10-14
Supplement: cr2014131x15.pdf [file cr2014131x15.pdf]

**Table S8.** The primers of MLPA for CNV detection

| <b>Individual</b> | <b>ID</b> | <b>Position</b> | <b>LPO</b>                                                      | <b>RPO</b>                                                         | <b>Distance to target (bp)</b> |
|-------------------|-----------|-----------------|-----------------------------------------------------------------|--------------------------------------------------------------------|--------------------------------|
| ACC1-II-1         | B1        | 15:80878576     | GGGTTCCCTAAGGGTTGGAGAGCCAAGTGCA<br>CAGGTTGCTTAAAGAGAAA          | TGGCTCAAAGGTGCTGTAGCAGACCAGGTTTT<br>CTAGATTGGATCTTGCTGGCAC         | 31                             |
| ACC1-II-1         | B2        | 4:165099831     | TAAAGATCTGGGCTCTCTGCAGGAATATGGA                                 | AAAGTCAGGCTGGTTGCAGGAAAGAGTGCAA                                    | 197                            |
| ACC1-II-1         | B3        | 6:85605629      | GGGTTCCCTAAGGGTTGGAGGCCTCAGAAACT<br>ACAACAGAGGAAAAGTGGAACAGCTT  | TTCCCACTACAAGTAGACACACTAAACCTTGC<br>AATAACGTCTAGATTGGATCTTGCTGGCAC | 49                             |
| ACC1-II-1         | B5        | 6:154692299     | GGGTTCCCTAAGGGTTGGATGGACTAAACCGA<br>TCACTGCCACCAAGTG            | GCAAATGTTATCATTGGAGCCCGGAAGCATCTA<br>GATTGGATCTTGCTGGCAC           | 405                            |
| ACC1-II-1         | B13       | 18:70512197     | GTTACCCACTTCTCCTCCAGGTGCACCCACAT<br>TACG                        | CACATGCCATGGCGCTCACCAAACCTGGGTATA<br>AACAC                         | 1                              |
| DS1-II-2          | F1        | 17:52287119     | GGGTTCCCTAAGGGTTGGATTAGTGGCAGTTA<br>CTGACATTGACCACAGAA          | TAAACAAGGGCATCACAACACTATCACCTGTT<br>CTAGATTGGATCTTGCTGGCAC         | 166                            |
| DS1-II-2          | F2        | 19:55529705     | GGGTTCCCTAAGGGTTGGATACGTGGGATCAG<br>GTGCCTCATGAAAGCCAGAGTCAT    | GTGGGCCAGTGGAAGTATCTAACCTATTATCA<br>GGGATCTAGATTGGATCTTGCTGGCAC    | 175                            |
| DS1-II-2          | F3        | 19:56343191     | GGGTTCCCTAAGGGTTGGATTTCGCGATGGAGG<br>GGAAATACTGCTGCACCTGCGTGTTT | CTGCCCAGATGCCCCAATTGTCTTTCTTCACCC<br>AGGACTTCTAGATTGGATCTTGCTGGCAC | 271                            |
| DS1-II-2          | F6        | 14:71380614     | GGGTTCCCTAAGGGTTGGAGAAGGTTAATGAC<br>TAGTGGATGGCCTGTTTA          | GATCTATTAGCCTGTGCCCTTACCAGTATTCT<br>AGATTGGATCTTGCTGGCAC           | 7                              |
| DS1-II-2          | F7        | 16:84073033     | GGGTTCCCTAAGGGTTGGATCTCACCCACGCT<br>CTAAGCTCCCTGAAGACTGGGTGGTA  | TCCTTTTTTCTATTTTGCCCCAGAGAAGGGCCT<br>GACAAATCTAGATTGGATCTTGCTGGCAC | 5                              |

|          |     |             |                                                                            |                                                                               |      |
|----------|-----|-------------|----------------------------------------------------------------------------|-------------------------------------------------------------------------------|------|
| DS1-II-2 | F9  | 13:79932615 | GGGTTCCCTAAGGGTTGGAGAAAGTCTCTTGA<br>CAGGTCTGATCTATAACCTCCTTCCTCTAATGAT     | GAGAGGCTCATGACTATCCTGTATATAGCTAGT<br>ATTCAACAGGTCTTCTAGATTGGATCTTGCTGG<br>CAC | 739  |
| DS1-II-2 | F10 | 2:166848782 | GGGTTCCCTAAGGGTTGGATCTTGCTCATGTTT<br>TTCCACAATTGGCTTTGTACCCGGTCATAGG       | AAGGTGGACAAGCTGCAGTGGACATGGTCAG<br>ATCAGTTTTTCTGTTCTAGATTGGATCTTGCTG<br>GCAC  | 904  |
| DS2-I-1  | X1  | 1:72008400  | GGGTTCCCTAAGGGTTGGAGTGACAGACAAC<br>ACCAGAAGGGGAAGTCAGA                     | TGGATTCTTTGCTGGTACGAGCCTGTTGACATC<br>TAGATTGGATCTTGCTGGCAC                    | 343  |
| DS2-I-1  | X2  | 16:64312186 | GGGTTCCCTAAGGGTTGGATCTGCATGACTATG<br>CTATGTGAACCTTGTA                      | TGACTCAGGTTGTAAGCCACTTTTCTATGTTTT<br>CTAGATTGGATCTTGCTGGCAC                   | 89   |
| DS2-I-1  | X3  | X:68611473  | GGGTTCCCTAAGGGTTGGATCCAAGAACACAG<br>CACACCAAACAGAGGGGCAACACA               | TAATGAGAGTCCCTCAGCAAGGCTTTTGTGAG<br>GACTCTAGATTGGATCTTGCTGGCAC                | 340  |
| DS2-I-1  | X6  | 2:166854673 | GGGTTCCCTAAGGGTTGGATCAAGGGGGAGTG<br>GGTAGTTGTAGGGATAAAGTAACAAA             | TTGCTTTTGGGAAAGAGGCATATTCGGTTGCTT<br>TCTAGTTCTAGATTGGATCTTGCTGGCAC            | 410  |
| DS2-I-1  | X7  | 6:35755658  | GGGTTCCCTAAGGGTTGGAGCAGATGGGTCAG<br>TGACAGGCAGGGTTAC                       | AAGGTCTGGAGCTGGGAGGACTGAACATC<br>TAGATTGGATCTTGCTGGCAC                        | 234  |
| DS2-I-1  | X8  | 13:89662020 | GGGTTCCCTAAGGGTTGGACTGGAAGAACGT<br>GAAGCCTCTAGTAACTATAGCTACAGCAA           | AGATTAATCATAGCCCATCTGGTAGCCACATTA<br>ACATAAAATCTAGATTGGATCTTGCTGGCAC          | 1267 |
| DS2-I-1  | X10 | 4:3472325   | GGGTTCCCTAAGGGTTGGAGAATGTAACCTTGT<br>TGAACAAAGGAGGTGCTGGTTGGGGGCAATG<br>GA | AGGAACTGGTTGTTATCAGGTGCCGGAGCTGT<br>CTGCCAGGGTGTGGTCTAGATTGGATCTTGCTG<br>GCAC | 249  |

---
